# Supplementary material for: EAST Organizes Drosophila Insulator Proteins in the Interchromosomal Nuclear Compartment and Modulates CP190 Binding to Chromatin
Source: PubMed Central journal article supplement (PMC4638101; doi:10.1371/journal.pone.0140991), 2015-10-21
Supplement: pone.0140991.s014.pdf [file pone.0140991.s014.pdf]

**S2 Table. Summary of yeast two-hybrid analysis of Mod(mdg4)-67.2 or CP190 domains for interaction with EAST<sup>933-2362</sup>**

| <b>Mod(mdg4)-67.2</b>   | <b>EAST<sup>933-2362</sup> bait</b> | <b>EAST<sup>933-2362</sup> prey</b> |
|-------------------------|-------------------------------------|-------------------------------------|
| <b>1-610</b>            | +++                                 | +++                                 |
| <b>1-510</b>            | +++                                 | ++                                  |
| <b>1-465</b>            | +++                                 | ++                                  |
| <b>1-273</b>            | +++                                 | +++                                 |
| <b>120-610</b>          | -                                   | -                                   |
| <b>1-610 (Δ145-273)</b> | +++                                 | ++                                  |
| <b>1-610 (Δ310-390)</b> | +++                                 | ++                                  |
| <b>1-145</b>            | +++                                 | +++                                 |

| <b>CP190</b>            | <b>EAST<sup>933-2362</sup> bait</b> | <b>EAST<sup>933-2362</sup> prey</b> |
|-------------------------|-------------------------------------|-------------------------------------|
| <b>1-1097</b>           | +++                                 | +++                                 |
| <b>1-767</b>            | +++                                 | +++                                 |
| <b>1-610</b>            | +++                                 | +++                                 |
| <b>125-610</b>          | -                                   | -                                   |
| <b>1-542</b>            | ++                                  | ++                                  |
| <b>1-308</b>            | -                                   | -                                   |
| <b>1-1097 (308-430)</b> | +                                   | -                                   |

Designations are as in Table S1.
