# Supplementary material for: EAST Organizes Drosophila Insulator Proteins in the Interchromosomal Nuclear Compartment and Modulates CP190 Binding to Chromatin
Source: PubMed Central journal article supplement (PMC4638101; doi:10.1371/journal.pone.0140991), 2015-10-21
Supplement: pone.0140991.s015.pdf [file pone.0140991.s015.pdf]

**S3 Table. Primer sequences used in PCR for ChIP analysis**

| <b>Primer pair</b>        | <b>Sequences</b>                                                   |
|---------------------------|--------------------------------------------------------------------|
| Idgf4 fw<br>Idgf4 rev     | 5' AAGGGCACTTCAGTTCACGATT 3'<br>5' CACTATTCGAGCATTGCATTCG 3'       |
| ptth fw<br>ptth rev       | 5' GTGCAAAGGCAGATGAATGGTA 3'<br>5' GCCTCTTGGACAGTCGTTCT 3'         |
| cg9629 fw<br>cg9629 rev   | 5' GGCTTTTGTGGGCAGCTTATC 3'<br>5' TGCATGGATCCTAGGGAAATG 3'         |
| hlm fw<br>hml rev         | 5' CGCATGAACCGTAAACTGCTTG 3'<br>5' CTTCTCCAATGGCATTGAACTTG 3'      |
| cg31472 fw<br>cg31472 rev | 5' CACAAGGTGGGACTGGCTAC 3'<br>5' CTTTTCTGCGGTACTTGAGCAC 3'         |
| Mpcp fw<br>Mpcp rev       | 5' CTCACCTGATACCTCGTATGC 3'<br>5' GTTTTGCCGTGGAGAGGTGTA 3'         |
| cg13575 fw<br>cg13575 rev | 5'GGAACGACGTGCGCATAGTAA 3'<br>5' GACAGATTTATGGCCAGCGACT 3'         |
| prosap fw<br>prosap rev   | 5' CGTTGGGCTTACAGCTCTAG 3'<br>5' GCGCAATCCGTCATACAGAAC 3'          |
| Oat fw<br>Oat rev         | 5' CGCGTTTCATTAGCTACCTCGAA 3'<br>5' GAAATGGCAGTGGGATCGGAAT 3'      |
| dCTCF fw<br>dCTCF rev     | 5' TCGTCCACATGAAACAGCTG 3'<br>5'TCCTTGGCTTATCCAGTATCCA 3'          |
| cg9018 fw<br>cg9018 rev   | 5' GGCTGTGTCATCAATCAAGTG 3'<br>5' CTCCAACGAGCCCACCACA 3'           |
| cg3358 fw<br>cg3358 rev   | 5' GCTGGCACGTCTGAGCTTAG 3'<br>5' CAGCTGTTTCACTTGCGAGATT 3'         |
| cg14545 f<br>cg14545 rev  | 5' TGCAGCACCTGGCGGTAGATT 3'<br>5' CGCATCCAACCTGGTCACACT 3'         |
| 62D fw<br>62D rev         | 5' TTTGGGCTTGGTGAGAACAG 3'<br>5' TGATACCAGGCGAACAGAAATC 3'         |
| 50A fw<br>50A rev         | 5' ATACAAAGTGGTTTCAGCCAAGAAG 3'<br>5' TTGATAAATAGTCCAGCACGCATAC 3' |
| 87E fw<br>87E rev         | 5' GGATGTTACA TTGAGAGTGCTTAGG3'<br>5' TTTGCGTTTCGGCTGCTGTC 3'      |

|             |                                |
|-------------|--------------------------------|
| 1A2 fw      | 5' ACCACACATCAGTCATCGTGT 3'    |
| 1A2 rev     | 5' CTTCGTCTACCGTTGTGC 3'       |
| Gypsy fw    | 5' TTCTCTAAAAAGTATGCAGCACTT 3' |
| Gypsy rev   | 5'CACGTAATAAGTGTGCGTTGA 3'     |
| Ras fw      | 5' GAGGGATTCCCTGCTCGTCTTCG 3'  |
| Ras rev     | 5' GTCGCACTTGTTACCCACCATC 3'   |
| 42337 fw    | 5' TTGATGTCCCTCCGCTCTCA 3'     |
| 42337 rev   | 5' CCAACATTGACCATCCAACGAG 3'   |
| 15878 fw    | 5' GTGAACTCAATTTGCTGGCATC 3'   |
| 15878 rev   | 5' CGTTGTGTTCCGCCGCTTTTG 3'    |
| cg32333 fw  | 5' CAAAAAGTTGCCGGACGACCAAA 3'  |
| cg32333 rev | 5' CTAATTGCCAGCGCCAACCTT 3'    |
| cg33288 fw  | 5' CATGGCTCGTATTCCGAGAGAT 3'   |
| cg33288 rev | 5' CTATGGAAATGTTAGCGAGTGAG 3'  |
| beat fw     | 5' AATCAGCCGTTAACCGCTAAAG 3'   |
| beat rev    | 5' CATGGCATCATCATCAGTAG 3'     |
| Dad fw      | 5' TCGTCGATAAGGAGCGCAAGA 3'    |
| Dad rev     | 5' CGACGCCAGTGCATATGCAA 3'     |
| Ipp fw      | 5' GGATTATAGCTGCTGTTTGAAG 3'   |
| Ipp rev     | 5' TACCGCACAGAACTCCAATAAG 3'   |
| Spn fw      | 5' AGTGTTGCGGATTGCCTGCAT 3'    |
| Spn rev     | 5' AGTACGTGCTGCGGCGACAA 3'     |
| Adar fw     | 5' CTAGCAAGCCGATGATGAAGTTG 3'  |
| Adar rev    | 5' GGTAAGGTTACGCGAACCTAA 3'    |
| 43921 fw    | 5' CAGGACGATTGCGCAGCAAAG 3'    |
| 43921 rev   | 5' GCCCGCTATTGGTGGTGTTC 3'     |
